# Supplementary material for: Breadth versus depth: Cumulative risk model and continuous measure prediction of poor language and reading outcomes at 12
Source: PubMed Central journal article supplement (PMC11475567; doi:10.1111/desc.12998), 2020-06-22
Supplement: DESC-24-e12998-s001.pdf [file DESC-24-e12998-s001.pdf]

Reading Comprehension classification at 12

| Node 0        |       |     |
|---------------|-------|-----|
| Category      | %     | n   |
| Unaffected    | 80.8  | 160 |
| Poor RC at 12 | 19.2  | 38  |
| Total         | 100.0 | 198 |

Nonverbal Classification at 4½  
Improvement = 0.059

affected

| Node 1        |      |    |
|---------------|------|----|
| Category      | %    | n  |
| Unaffected    | 44.4 | 16 |
| Poor RC at 12 | 55.6 | 20 |
| Total         | 18.2 | 36 |

unaffected

| Node 2        |      |     |
|---------------|------|-----|
| Category      | %    | n   |
| Unaffected    | 88.9 | 144 |
| Poor RC at 12 | 11.1 | 18  |
| Total         | 81.8 | 162 |

Family History of Language or Reading Difficulties  
Improvement = 0.008

No Family History of Language or Reading Difficulties

| Node 3        |      |    |
|---------------|------|----|
| Category      | %    | n  |
| Unaffected    | 53.8 | 14 |
| Poor RC at 12 | 46.2 | 12 |
| Total         | 13.1 | 26 |

Family History of Language or Reading Difficulties

| Node 4        |      |    |
|---------------|------|----|
| Category      | %    | n  |
| Unaffected    | 20.0 | 2  |
| Poor RC at 12 | 80.0 | 8  |
| Total         | 5.1  | 10 |

Language Classification at 4½  
Improvement = 0.015

unaffected

| Node 5        |      |    |
|---------------|------|----|
| Category      | %    | n  |
| Unaffected    | 33.3 | 5  |
| Poor RC at 12 | 66.7 | 10 |
| Total         | 7.6  | 15 |

affected

| Node 6        |      |    |
|---------------|------|----|
| Category      | %    | n  |
| Unaffected    | 81.8 | 9  |
| Poor RC at 12 | 18.2 | 2  |
| Total         | 5.6  | 11 |
