# Supplementary material for: Breadth versus depth: Cumulative risk model and continuous measure prediction of poor language and reading outcomes at 12
Source: PubMed Central journal article supplement (PMC11475567; doi:10.1111/desc.12998), 2020-06-22
Supplement: DESC-24-e12998-s004.pdf [file DESC-24-e12998-s004.pdf]

Reading Fluency classification at 12

| Node 0          |       |     |
|-----------------|-------|-----|
| Category        | %     | n   |
| Unaffected      | 83.4  | 171 |
| Poor Read at 12 | 16.6  | 34  |
| Total           | 100.0 | 205 |

Speech Composite z-score at 4½  
Improvement = 0.033

<= -0.442

> -0.442

| Node 1          |      |    |
|-----------------|------|----|
| Category        | %    | n  |
| Unaffected      | 68.2 | 58 |
| Poor Read at 12 | 31.8 | 27 |
| Total           | 41.5 | 85 |

| Node 2          |      |     |
|-----------------|------|-----|
| Category        | %    | n   |
| Unaffected      | 94.2 | 113 |
| Poor Read at 12 | 5.8  | 7   |
| Total           | 58.5 | 120 |

Family History of Language or Reading Difficulties  
Improvement = 0.025

No Family History of Language or Reading Difficulties

Family History of Language or Reading Difficulties

| Node 3          |      |    |
|-----------------|------|----|
| Category        | %    | n  |
| Unaffected      | 82.4 | 42 |
| Poor Read at 12 | 17.6 | 9  |
| Total           | 24.9 | 51 |

| Node 4          |      |    |
|-----------------|------|----|
| Category        | %    | n  |
| Unaffected      | 47.1 | 16 |
| Poor Read at 12 | 52.9 | 18 |
| Total           | 16.6 | 34 |

Speech Composite z-score at 4½  
Improvement = 0.021

Language Composite z-score at 4½  
Improvement = 0.012

<= -0.508

> -0.508

<= -0.030

> -0.030

| Node 5          |      |    |
|-----------------|------|----|
| Category        | %    | n  |
| Unaffected      | 87.5 | 42 |
| Poor Read at 12 | 12.5 | 6  |
| Total           | 23.4 | 48 |

| Node 6          |       |   |
|-----------------|-------|---|
| Category        | %     | n |
| Unaffected      | 0.0   | 0 |
| Poor Read at 12 | 100.0 | 3 |
| Total           | 1.5   | 3 |

| Node 7          |      |    |
|-----------------|------|----|
| Category        | %    | n  |
| Unaffected      | 40.0 | 12 |
| Poor Read at 12 | 60.0 | 18 |
| Total           | 14.6 | 30 |

| Node 8          |       |   |
|-----------------|-------|---|
| Category        | %     | n |
| Unaffected      | 100.0 | 4 |
| Poor Read at 12 | 0.0   | 0 |
| Total           | 2.0   | 4 |
