# Supplementary material for: Breadth versus depth: Cumulative risk model and continuous measure prediction of poor language and reading outcomes at 12
Source: PubMed Central journal article supplement (PMC11475567; doi:10.1111/desc.12998), 2020-06-22
Supplement: DESC-24-e12998-s005.pdf [file DESC-24-e12998-s005.pdf]

Reading Fluency classification at 12

| Node 0          |       |     |
|-----------------|-------|-----|
| Category        | %     | n   |
| Unaffected      | 80.8  | 160 |
| Poor Read at 12 | 19.2  | 38  |
| Total           | 100.0 | 198 |

Family History of Language or Reading Difficulties  
Improvement = 0.024

No Family History of Language or Reading Difficulties

| Node 1          |      |     |
|-----------------|------|-----|
| Category        | %    | n   |
| Unaffected      | 90.0 | 135 |
| Poor Read at 12 | 10.0 | 15  |
| Total           | 73.2 | 150 |

Family History of Language or Reading Difficulties

| Node 2          |      |    |
|-----------------|------|----|
| Category        | %    | n  |
| Unaffected      | 65.5 | 36 |
| Poor Read at 12 | 34.5 | 19 |
| Total           | 26.8 | 55 |

Speech classification at 4%  
Improvement = 0.015

unaffected

| Node 3          |      |    |
|-----------------|------|----|
| Category        | %    | n  |
| Unaffected      | 77.8 | 28 |
| Poor Read at 12 | 22.2 | 8  |
| Total           | 17.6 | 36 |

affected

| Node 4          |      |    |
|-----------------|------|----|
| Category        | %    | n  |
| Unaffected      | 42.1 | 8  |
| Poor Read at 12 | 57.9 | 11 |
| Total           | 9.3  | 19 |

Letter Knowledge Classification at 4  
Improvement = 0.006

unaffected

| Node 5          |      |    |
|-----------------|------|----|
| Category        | %    | n  |
| Unaffected      | 27.3 | 3  |
| Poor Read at 12 | 72.7 | 8  |
| Total           | 5.4  | 11 |

affected

| Node 6          |      |   |
|-----------------|------|---|
| Category        | %    | n |
| Unaffected      | 62.5 | 5 |
| Poor Read at 12 | 37.5 | 3 |
| Total           | 3.9  | 8 |
