# Supplementary material for: Breadth versus depth: Cumulative risk model and continuous measure prediction of poor language and reading outcomes at 12
Source: PubMed Central journal article supplement (PMC11475567; doi:10.1111/desc.12998), 2020-06-22
Supplement: DESC-24-e12998-s007.pdf [file DESC-24-e12998-s007.pdf]

Language classification at 12

| Node 0          |       |     |
|-----------------|-------|-----|
| Category        | %     | n   |
| Unaffected      | 80.5  | 140 |
| Poor Lang at 12 | 19.5  | 34  |
| Total           | 100.0 | 174 |

Language classification at 4½  
Improvement = 0.042

unaffected                      affected

| Node 1          |      |     |
|-----------------|------|-----|
| Category        | %    | n   |
| Unaffected      | 88.6 | 117 |
| Poor Lang at 12 | 11.4 | 15  |
| Total           | 75.9 | 132 |

| Node 2          |      |    |
|-----------------|------|----|
| Category        | %    | n  |
| Unaffected      | 54.8 | 23 |
| Poor Lang at 12 | 45.2 | 19 |
| Total           | 24.1 | 42 |

Phon. Awareness classification at 4½  
Improvement = 0.004

unaffected                      affected

| Node 3          |      |    |
|-----------------|------|----|
| Category        | %    | n  |
| Unaffected      | 70.0 | 7  |
| Poor Lang at 12 | 30.0 | 3  |
| Total           | 5.7  | 10 |

| Node 4          |      |    |
|-----------------|------|----|
| Category        | %    | n  |
| Unaffected      | 50.0 | 16 |
| Poor Lang at 12 | 50.0 | 16 |
| Total           | 18.4 | 32 |

Nonverbal classification at 4½  
Improvement = 0.010

Speech classification at 4½  
Improvement = 0.002

unaffected

affected

unaffected

affected

| Node 5          |       |   |
|-----------------|-------|---|
| Category        | %     | n |
| Unaffected      | 100.0 | 5 |
| Poor Lang at 12 | 0.0   | 0 |
| Total           | 2.9   | 5 |

| Node 6          |      |   |
|-----------------|------|---|
| Category        | %    | n |
| Unaffected      | 40.0 | 2 |
| Poor Lang at 12 | 60.0 | 3 |
| Total           | 2.9  | 5 |

| Node 7          |      |    |
|-----------------|------|----|
| Category        | %    | n  |
| Unaffected      | 45.5 | 10 |
| Poor Lang at 12 | 54.5 | 12 |
| Total           | 12.6 | 22 |

| Node 8          |      |    |
|-----------------|------|----|
| Category        | %    | n  |
| Unaffected      | 60.0 | 6  |
| Poor Lang at 12 | 40.0 | 4  |
| Total           | 5.7  | 10 |
