# Supplementary material for: Breadth versus depth: Cumulative risk model and continuous measure prediction of poor language and reading outcomes at 12
Source: PubMed Central journal article supplement (PMC11475567; doi:10.1111/desc.12998), 2020-06-22
Supplement: DESC-24-e12998-s008.pdf [file DESC-24-e12998-s008.pdf]

Reading Comprehension classification at 12

| Node 0        |       |     |
|---------------|-------|-----|
| Category      | %     | n   |
| Unaffected    | 80.8  | 160 |
| Poor RC at 12 | 19.2  | 38  |
| Total         | 100.0 | 198 |

Nonverbal Composite z-score at 4½  
Improvement = 0.078

<= -1.062

> -1.062

| Node 1        |      |    |
|---------------|------|----|
| Category      | %    | n  |
| Unaffected    | 44.4 | 20 |
| Poor RC at 12 | 55.6 | 25 |
| Total         | 22.7 | 45 |

| Node 2        |      |     |
|---------------|------|-----|
| Category      | %    | n   |
| Unaffected    | 91.5 | 140 |
| Poor RC at 12 | 8.5  | 13  |
| Total         | 77.3 | 153 |

Language Composite z-score at 4½  
Improvement = 0.027

<= -1.486

> -1.486

| Node 3        |      |    |
|---------------|------|----|
| Category      | %    | n  |
| Unaffected    | 15.8 | 3  |
| Poor RC at 12 | 84.2 | 16 |
| Total         | 9.6  | 19 |

| Node 4        |      |    |
|---------------|------|----|
| Category      | %    | n  |
| Unaffected    | 65.4 | 17 |
| Poor RC at 12 | 34.6 | 9  |
| Total         | 13.1 | 26 |
