# Supplementary material for: Breadth versus depth: Cumulative risk model and continuous measure prediction of poor language and reading outcomes at 12
Source: Dev Sci. 2020 Jun 22;24(1):e12998. doi: 10.1111/desc.12998 (PMC11475567; doi:10.1111/desc.12998)
Supplement: Supplementary file 2 — Figure S1b [file DESC-24-e12998-s006.pdf]

Language classification at 12

| Node 0          |       |     |
|-----------------|-------|-----|
| Category        | %     | n   |
| Unaffected      | 80.5  | 140 |
| Poor Lang at 12 | 19.5  | 34  |
| Total           | 100.0 | 174 |

Language Composite z-score at 4%  
Improvement = 0.061

<= -1.450

> -1.450

| Node 1          |      |    |
|-----------------|------|----|
| Category        | %    | n  |
| Unaffected      | 43.8 | 14 |
| Poor Lang at 12 | 56.2 | 18 |
| Total           | 18.4 | 32 |

Letter Knowledge z-score at 4  
Improvement = 0.010

| Node 2          |      |     |
|-----------------|------|-----|
| Category        | %    | n   |
| Unaffected      | 88.7 | 126 |
| Poor Lang at 12 | 11.3 | 16  |
| Total           | 81.6 | 142 |

Nonverbal Composite z-score at 4%  
Improvement = 0.015

<= 0.834

z > .834

<= -0.521

> -0.521

| Node 3          |      |    |
|-----------------|------|----|
| Category        | %    | n  |
| Unaffected      | 50.0 | 14 |
| Poor Lang at 12 | 50.0 | 14 |
| Total           | 16.1 | 28 |

Language Composite z-score at 4%  
Improvement = 0.016

| Node 4          |       |   |
|-----------------|-------|---|
| Category        | %     | n |
| Unaffected      | 0.0   | 0 |
| Poor Lang at 12 | 100.0 | 4 |
| Total           | 2.3   | 4 |

| Node 5          |      |    |
|-----------------|------|----|
| Category        | %    | n  |
| Unaffected      | 74.4 | 32 |
| Poor Lang at 12 | 25.6 | 11 |
| Total           | 24.7 | 43 |

Nonverbal Composite z-score at 4%  
Improvement = 0.019

| Node            |      |    |
|-----------------|------|----|
| Category        | %    | n  |
| Unaffected      | 94.9 | 94 |
| Poor Lang at 12 | 5.1  | 5  |
| Total           | 56.9 | 99 |

<= -1.908

> -1.908

<= -0.577

> -0.577

| Node 7          |      |    |
|-----------------|------|----|
| Category        | %    | n  |
| Unaffected      | 33.3 | 6  |
| Poor Lang at 12 | 66.7 | 12 |
| Total           | 10.3 | 18 |

Speech Composite z-score at 4%  
Improvement = 0.018

| Node 8          |      |    |
|-----------------|------|----|
| Category        | %    | n  |
| Unaffected      | 80.0 | 8  |
| Poor Lang at 12 | 20.0 | 2  |
| Total           | 5.7  | 10 |

| Node 9          |      |    |
|-----------------|------|----|
| Category        | %    | N  |
| Unaffected      | 81.6 | 31 |
| Poor Lang at 12 | 18.4 | 7  |
| Total           | 21.8 | 38 |

Phon. Awareness z-score at 4%  
Improvement = 0.016

| Node 10         |      |   |
|-----------------|------|---|
| Category        | %    | n |
| Unaffected      | 20.0 | 1 |
| Poor Lang at 12 | 80.0 | 4 |
| Total           | 2.9  | 5 |

<= 0.095

> 0.095

<= -0.096

> -0.096

| Node 11         |      |    |
|-----------------|------|----|
| Category        | %    | n  |
| Unaffected      | 20.0 | 3  |
| Poor Lang at 12 | 80.0 | 12 |
| Total           | 8.6  | 15 |

| Node 12         |       |   |
|-----------------|-------|---|
| Category        | %     | n |
| Unaffected      | 100.0 | 3 |
| Poor Lang at 12 | 0.0   | 0 |
| Total           | 1.7   | 3 |

| Node 13         |      |    |
|-----------------|------|----|
| Category        | %    | n  |
| Unaffected      | 92.9 | 26 |
| Poor Lang at 12 | 7.1  | 2  |
| Total           | 16.1 | 28 |

| Node 14         |      |    |
|-----------------|------|----|
| Category        | %    | n  |
| Unaffected      | 50.0 | 5  |
| Poor Lang at 12 | 50.0 | 5  |
| Total           | 5.7  | 10 |

Speech Composite z-score at 4%  
Improvement = 0.012

<= 0.318

> 0.318

| Node 15         |      |   |
|-----------------|------|---|
| Category        | %    | n |
| Unaffected      | 28.6 | 2 |
| Poor Lang at 12 | 71.4 | 5 |
| Total           | 4.0  | 7 |

| Node 16         |       |   |
|-----------------|-------|---|
| Category        | %     | n |
| Unaffected      | 100.0 | 3 |
| Poor Lang at 12 | 0.0   | 0 |
| Total           | 1.7   | 3 |
